# Supplementary material
Source: publisher figshare collection journal article supplement (https://karger.figshare.com/ndownloader/files/40893047)
Supplement: Supplementary file 1 [file 40893047]

Supplementary material

Tuned the hyperparameters:

The final parameters used were “1 year = {'learning_rate': 0.05811461859916969, 'min_child_weight': 3, 'max_depth': 4, 'colsample_bytree': 0.6635312112868554, 'subsample': 0. 7363826915307297, 'reg_alpha': 0.03974099424691413, 'reg_lambda': 0.00010222170608885958, 'gamma': 0.028945262488630805}

3 year = {'learning_rate': 0.08566665798184023, 'min_child_weight': 2, 'max_depth': 6, 'colsample_bytree': 0.6332864539990984, 'subsample': 0. 8749273245384632, 'reg_alpha': 0.010240948422244883, 'reg_lambda': 0.0006712774237446539, 'gamma': 0.013301717822084034}”.
